# Supplementary material for: HLA-E Polymorphism Determines Susceptibility to BK Virus Nephropathy after Living-Donor Kidney Transplant
Source: MDPI journal article supplement (doi:10.3390/cells8080847), 2019-08-07
Supplement: s1 [file s1]

## Supplementary Tables 1a-1i

| CMV Protein pUL40 |           |               |               |
|-------------------|-----------|---------------|---------------|
| Position          | Peptide   | 1-log50k(aff) | Affinity (nM) |
| 14                | VMAPRTLIL | 0.589         | 85.69         |
| 171               | KLRPATFGL | 0.273         | 2610.87       |
| 96                | HHPADNTLL | 0.173         | 7724.60       |
| 28                | CMRIRSLLC | 0.133         | 11856.34      |

**Supplementary Table 1a:** High- and moderate-affinity peptide sequences derived from CMV Protein UL40 that may be presented by HLA-E\*01:01 allelic variations identified by the machine-learning bioinformatics algorithm NetMHC 4.0. Position: residue number (starting from 0); Peptide: Amino acid sequence of the potential ligand

| CMV Protein pUL18 |           |               |               |
|-------------------|-----------|---------------|---------------|
| Position          | Peptide   | 1-log50k(aff) | Affinity (nM) |
| 253               | SEPQCNPLL | 0.273         | 2614.63       |
| 322               | TMTISSVLL | 0.264         | 2873.80       |
| 0                 | MMTMWCLTL | 0.193         | 6212.24       |

**Supplementary Table 1b:** High- and moderate-affinity peptide sequences derived from CMV Protein UL18 that may be presented by HLA-E\*01:01 allelic variations identified by the machine-learning bioinformatics algorithm NetMHC 4.0. Position: residue number (starting from 0); Peptide: Amino acid sequence of the potential ligand

| CMV Phosphorylated matrix protein pp65 (pUL83) |           |               |               |
|------------------------------------------------|-----------|---------------|---------------|
| Position                                       | Peptide   | 1-log50k(aff) | Affinity (nM) |
| 33                                             | VLPHETRL  | 0.330         | 1405.23       |
| 179                                            | VYYTSAFVF | 0.214         | 4939.59       |
| 273                                            | VLCPKNMII | 0.198         | 5854.48       |
| 304                                            | LCPKSIPGL | 0.189         | 6478.31       |
| 14                                             | LGPISGHVL | 0.163         | 8530.14       |
| 48                                             | RVSQPSLIL | 0.151         | 9747.11       |
| 319                                            | LMNGQQIFL | 0.148         | 100046.59     |
| 483                                            | WPPWQAGIL | 0.143         | 10664.68      |
| 26                                             | FSRGDTPVL | 0.142         | 10790.14      |

**Supplementary Table 1c:** High- and moderate-affinity peptide sequences derived from CMV Phosphorylated matrix protein pp65 (UL83) that may be presented by HLA-E\*01:01 allelic variations identified by the machine-learning bioinformatics algorithm NetMHC 4.0. Position: residue number (starting from 0); Peptide: Amino acid sequence of the potential ligand

| CMV Immediate-early protein 1 (pUL123) |           |               |               |
|----------------------------------------|-----------|---------------|---------------|
| pos                                    | Peptide   | 1-log50k(aff) | Affinity (nM) |
| 325                                    | VMLAKRPLI | 0.303         | 1887.52       |
| 404                                    | VSPPEPVP  | 0.203         | 5571.62       |
| 249                                    | IMAYAQKIF | 0.168         | 8151.27       |
| 319                                    | VLEETSVML | 0.165         | 8361.18       |
| 300                                    | TMYGGISLL | 0.134         | 11774.14      |

**Supplementary Table 1d:** High- and moderate-affinity peptide sequences derived from CMV immediate-early protein 1 (UL123) that may be presented by HLA-E\*01:01 allelic variations identified by the machine-learning bioinformatics algorithm NetMHC 4.0. Position: residue number (starting from 0); Peptide: Amino acid sequence of the potential ligand

| Human leukocyte antigen-G |           |               |               |
|---------------------------|-----------|---------------|---------------|
| Position                  | Peptide   | 1-log50k(aff) | Affinity (nM) |
| 2                         | VMAPRTLFL | 0.564         | 112.12        |
| 67                        | RMEPRAPWV | 0.439         | 432.80        |
| 3                         | MAPRTLFL  | 0.308         | 1785.34       |
| 10                        | LLLSGALTL | 0.194         | 6125.67       |

**Supplementary Table 1e:** High- and moderate-affinity peptide sequences derived from Human leukocyte antigen G that may be presented by HLA-E\*01:01 allelic variations identified by the machine-learning bioinformatics algorithm NetMHC 4.0. Position: residue number (starting from 0); Peptide: Amino acid sequence of the potential ligand

| Human leukocyte antigen-Cw*3 |           |               |               |
|------------------------------|-----------|---------------|---------------|
| Position                     | Peptide   | 1-log50k(aff) | Affinity (nM) |
| 2                            | VMAPRTLIL | 0.589         | 85.69         |
| 3                            | MAPRTLILL | 0.217         | 4799.04       |
| 67                           | RGEPRAPWV | 0.187         | 6597.71       |
| 10                           | LLLSGALAL | 0.164         | 8448.21       |

**Supplementary Table 1f:** High- and moderate-affinity peptide sequences derived from Human leukocyte antigen Cw\*3 that may be presented by HLA-E\*01:01 allelic variations identified by the machine-learning bioinformatics algorithm NetMHC 4.0. Position: residue number (starting from 0); Peptide: Amino acid sequence of the potential ligand

| Human heat shock protein 60 (hsp60) |           |               |               |
|-------------------------------------|-----------|---------------|---------------|
| Position                            | Peptide   | 1-log50k(aff) | Affinity (nM) |
| 9                                   | QMRPVSRVL | 0.276         | 2530.17       |
| 137                                 | VEIRRGVML | 0.173         | 7690.49       |
| 53                                  | TMGPKGRTV | 0.160         | 8844.42       |
| 32                                  | GADARALML | 0.156         | 9285.31       |
| 442                                 | ALLRCIPAL | 0.153         | 9523.60       |
| 349                                 | VTKDDAMLL | 0.153         | 9542.06       |

**Supplementary Table 1g:** High- and moderate-affinity peptide sequences derived from Human heat shock protein 60 (hsp60) that may be presented by HLA-E\*01:01 allelic variations identified by the machine-learning bioinformatics algorithm NetMHC 4.0. Position: residue number (starting from 0); Peptide: Amino acid sequence of the potential ligand

| Human immunodeficiency virus 1 Gag protein |            |               |               |
|--------------------------------------------|------------|---------------|---------------|
| Position                                   | Peptide    | 1-log50k(aff) | Affinity (nM) |
| 256                                        | RMYSPPVSIL | 0.173         | 7728.11       |

**Table 4h:** High-affinity peptide sequences derived from Human immunodeficiency virus 1 Gag protein that may be presented by HLA-E\*01:01 allelic variations identified by the machine-learning bioinformatics algorithm NetMHC 4.0. Position: residue number (starting from 0); Peptide: Amino acid sequence of the potential ligand

| Mycobacterium tuberculosis Enoyl-[acyl-carrier-protein] reductase [NADH] |           |               |               |
|--------------------------------------------------------------------------|-----------|---------------|---------------|
| Position                                                                 | Peptide   | 1-log50k(aff) | Affinity (nM) |
| 52                                                                       | RLPAKAPLL | 0.547         | 134.77        |

**Supplementary Table 1i:** High-affinity peptide sequences derived from Mycobacterium tuberculosis Enoyl-[acyl-carrier-protein] reductase [NADH] that may be presented by HLA-E\*01:01 allelic variations identified by the machine-learning bioinformatics algorithm NetMHC 4.0. Position: residue number (starting from 0); Peptide: Amino acid sequence of the potential ligand
